# Supplementary material for: Kinetics of formation of supramolecular tubules of a sodium cholate derivative
Source: Royal Society of Chemistry journal article supplement (doi:10.1039/b905531b), 2009-01-01
Supplement: b905531b.pdf [file b905531b.pdf]

## Kinetics of Formation of Supramolecular Tubules of a Sodium Cholate Derivative

Luciano Galantini,<sup>\*a</sup> Claudia Leggio,<sup>a</sup> Aida Jover,<sup>b</sup> Francisco Meijide,<sup>b</sup> Nicolae Viorel Pavel,<sup>a</sup> Victor Hugo Soto Tellini,<sup>c</sup> José Vázquez Tato,<sup>b</sup> Roberto Di Leonardo<sup>a</sup> and Giancarlo Ruocco<sup>a</sup>

<sup>a</sup> Dipartimento di Chimica, Dipartimento di Fisica and Research center SOFT-INFM-CNR, Sapienza Università di Roma, P.le A. Moro 5, 00185 Roma, (Italy) Fax: (+39) 06 490631  
E-mail: l.galantini@caspur.it

<sup>b</sup> Departamento de Química Física, Facultad de Ciencias, Universidad de Santiago de Compostela, Avda. Alfonso X El Sabio s/n, 27002 Lugo, (Spain)

<sup>c</sup> Prof. V. H. Soto Tellini, Escuela de Química, Universidad de Costa Rica, San José, (Costa Rica)

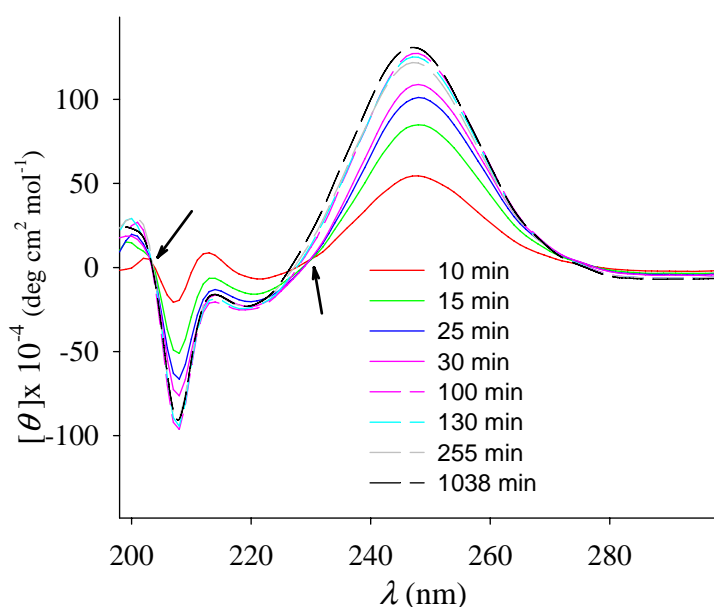

Evolution of the CD spectra at 40 °C, during the tubule formation process, for a 1.2 mM Na-butPhC sample in buffer 30 mM. The arrows show the short time isodichroic points.
